# Supplementary material
Source: PubMed Central journal article supplement (PMC2995645)
Supplement: supp_17.4.359_2009_1578_Online.pdf [file supp_17.4.359_2009_1578_Online.pdf]

**Figure 1. Influences on population health**

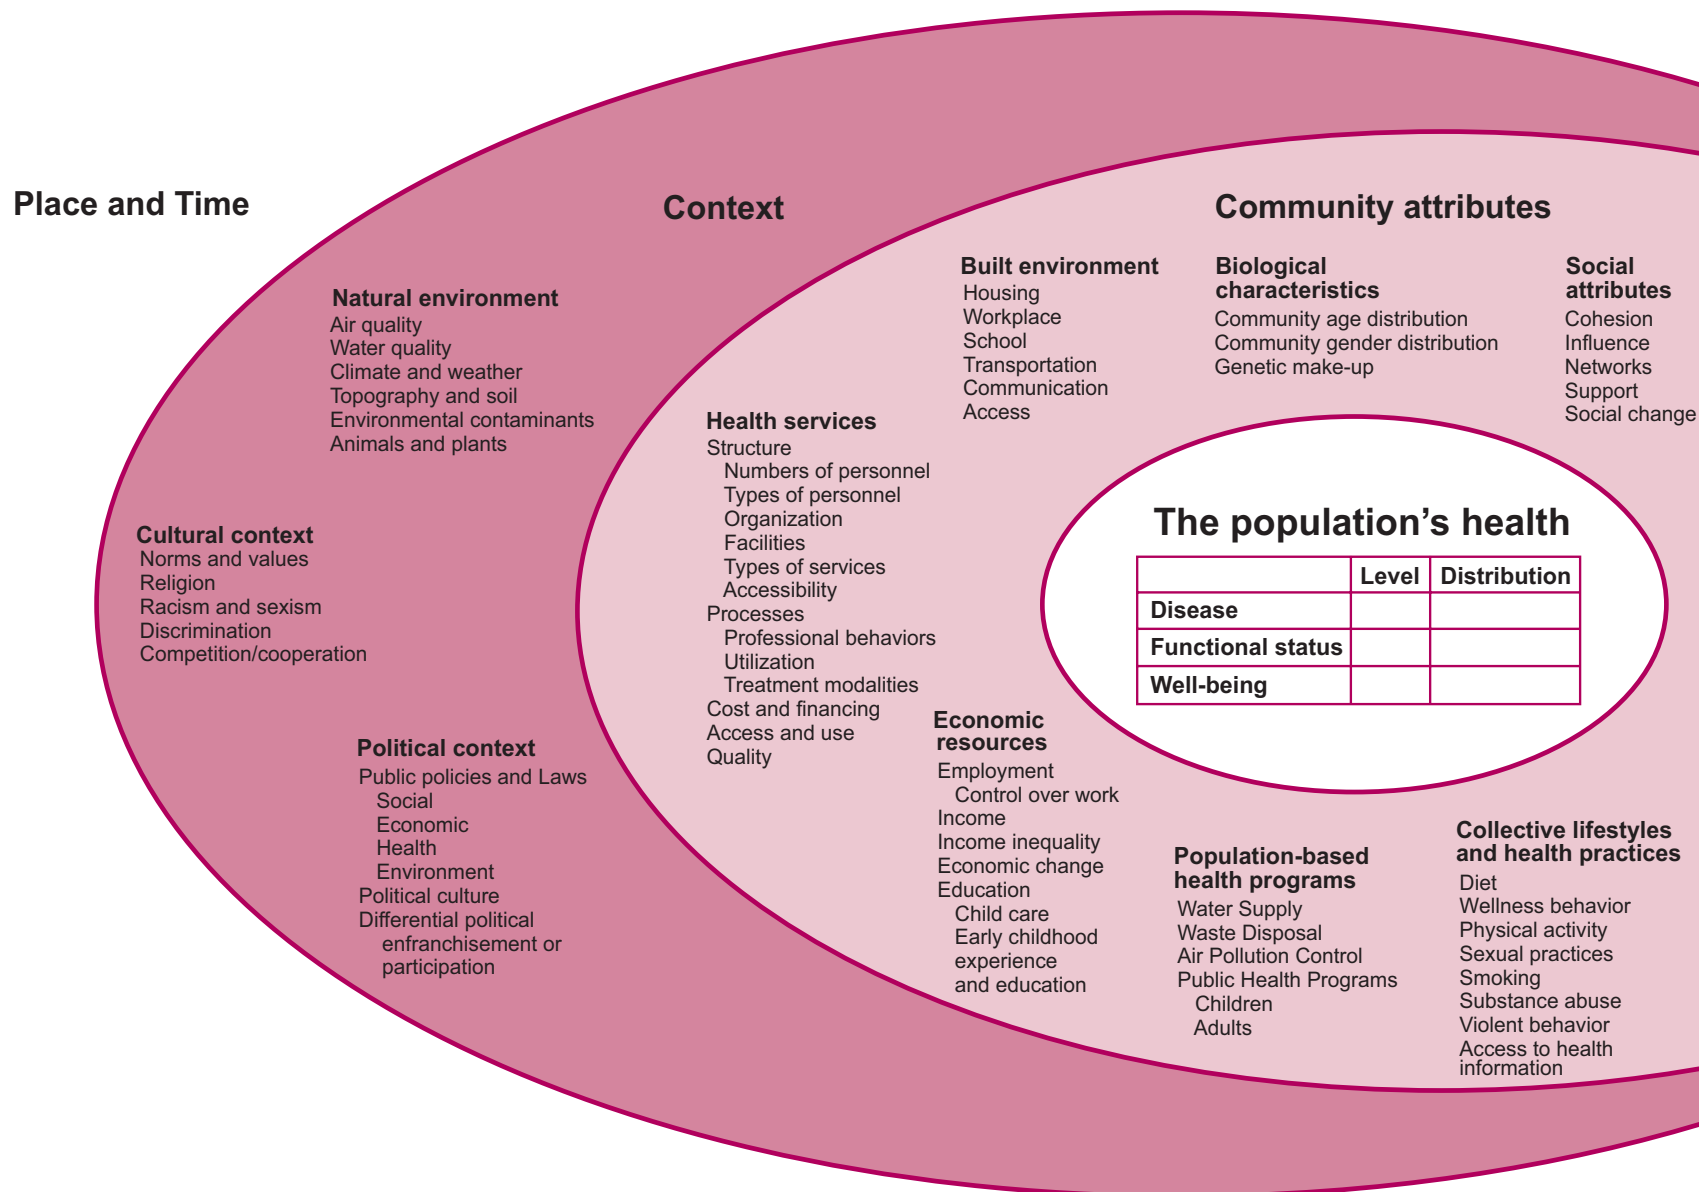

Source: Parrish RG, Friedman DJ, Hunter EL. Defining health statistics and their scope.

In: Friedman DJ, Hunter EL, Parrish RG, editors. Health statistics: shaping policy and practice to improve the population's health. New York City: Oxford University Press; 2005:18.
