# Supplementary material
Source: PubMed Central journal article supplement (PMC2995645)
Supplement: supp_17.4.359_appendix1.pdf [file supp_17.4.359_appendix1.pdf]

Appendix 1. Examples of factors influencing the population’s health, examples of statistics, measures, and indicators that reflect those factors, and examples of national and state level systems that gather this information

| <b>Influence on health</b> | <b>Examples of statistics, measures, and indicators</b>            | <b>Examples of data sources:<br/>National level</b>                      | <b>Examples of data sources<br/>State level</b>                                                        |
|----------------------------|--------------------------------------------------------------------|--------------------------------------------------------------------------|--------------------------------------------------------------------------------------------------------|
| <i>Natural environment</i> |                                                                    |                                                                          |                                                                                                        |
| Air quality                | % days air quality standards exceeded                              | Environmental Protection Agency, Aerometric Information Retrieval System | State environmental protection departments; state air quality control boards; state health departments |
| Climate and weather        | mean annual temperature, temperature range, and mean precipitation | National Weather Service; National Oceanographic and Atmospheric         | National Weather Service; National Oceanographic and Atmospheric                                       |
| Topography and soils       | % of land that is arable; % of land that is mountainous            | U.S. Geological Survey; U.S. Department of Agriculture                   | State agriculture departments; state geology departments; state environmental protection departments   |
| <i>Cultural context</i>    |                                                                    |                                                                          |                                                                                                        |
| Religion                   | % population reporting observance of specific religions            | General Social Survey (National Opinion Research Center)                 |                                                                                                        |
| <i>Political context</i>   |                                                                    |                                                                          |                                                                                                        |
| Political culture          | % of eligible population voting                                    | U.S Census Bureau                                                        | State departments of state                                                                             |

|                                                |                                                                              |                                                                                    |                                                                      |
|------------------------------------------------|------------------------------------------------------------------------------|------------------------------------------------------------------------------------|----------------------------------------------------------------------|
|                                                | in last election                                                             |                                                                                    |                                                                      |
| Public policies and laws                       | Presence/absence of individual laws                                          | Thomas—U.S. Congress on the Internet                                               | National Conference of State Legislatures                            |
| <b><i>Community attributes</i></b>             |                                                                              |                                                                                    |                                                                      |
| Age distribution                               | % population by age group                                                    | U.S. Census of Population                                                          | U.S. Census of Population                                            |
| Housing quality                                | mean number occupants per room, % housing units with structural deficiencies | American Community Survey; American Housing Survey                                 | American Community Survey; American Housing Survey                   |
| <b><i>Economic resources</i></b>               |                                                                              |                                                                                    |                                                                      |
| Employment                                     | % unemployment                                                               | U.S. Bureau of Labor Statistics                                                    | U.S. Bureau of Labor Statistics                                      |
| <b><i>Population-based health programs</i></b> |                                                                              |                                                                                    |                                                                      |
| Water supply                                   | % population with clean water supply                                         | Environmental Protection Agency                                                    | State environmental protection departments; state health departments |
| <b><i>Personal health practices</i></b>        |                                                                              |                                                                                    |                                                                      |
| Smoking                                        | % adults who smoke                                                           | National Health Interview Survey; National Health and Nutrition Examination Survey | State Behavioral Risk Factor Surveillance Systems                    |

Adapted from Department of Health and Human Services Data Council, Centers for Disease Control and Prevention, National Center for Health Statistics, National Committee on Vital and Health Statistics. *Shaping a Health Statistics Vision for the 21st Century*. Washington, DC: Department of Health and Human Services, 2002; pages 72-76.
