# Supplementary material
Source: PubMed Central journal article supplement (PMC2995645)
Supplement: supp_17.4.359_appendix2.pdf [file supp_17.4.359_appendix2.pdf]

Appendix 2. Examples of statistics, measures, and indicators that reflect population health, and examples of national and state level data sources for this information

| <b><i>Population health</i></b> | <b><i>Examples of statistics, measures, and indicators</i></b>                               | <b><i>Examples of data sources:<br/>National level</i></b>                         | <b><i>Examples of data sources:<br/>State level</i></b>                                        |
|---------------------------------|----------------------------------------------------------------------------------------------|------------------------------------------------------------------------------------|------------------------------------------------------------------------------------------------|
| <b><i>Disease</i></b>           |                                                                                              |                                                                                    |                                                                                                |
| Level                           | Life expectancy                                                                              | National Center for Health Statistics mortality files                              | National Center for Health Statistics mortality files; state health department mortality files |
| Distribution                    | Life expectancy by ethnic group, educational attainment, sex                                 | National Center for Health Statistics mortality files                              | National Center for Health Statistics mortality files; state health department mortality files |
| <b><i>Functional status</i></b> |                                                                                              |                                                                                    |                                                                                                |
| Level                           | % population with limitations of daily activity                                              | National Health Interview Survey; National Health and Nutrition Examination Survey | State Behavioral Risk Factor Surveillance Systems                                              |
| Distribution                    | by ethnic group, income, educational attainment, sex                                         | National Health Interview Survey; National Health and Nutrition Examination Survey | State Behavioral Risk Factor Surveillance Systems                                              |
| <b><i>Well-being</i></b>        |                                                                                              |                                                                                    |                                                                                                |
| Level                           | % population reporting excellent health                                                      | National Health Interview Survey; National Health and Nutrition Examination Survey | State Behavioral Risk Factor Surveillance Systems                                              |
| Distribution                    | % population reporting excellent health by ethnic group, income, educational attainment, sex | National Health Interview Survey; National Health and Nutrition Examination Survey | State Behavioral Risk Factor Surveillance Systems                                              |
